# Supplementary material for: The Potential Roles of Unique Leaf Structure for the Adaptation of Rheum tanguticum Maxim. ex Balf. in Qinghai–Tibetan Plateau
Source: MDPI journal article supplement (doi:10.3390/plants11040512), 2022-02-14
Supplement: s1 [file s1]

# Supplementary Material

Yanping Hu <sup>1</sup>, Huixuan Zhang <sup>1,6</sup>, Qian Qian <sup>1,6</sup>, Gonghua Lin <sup>3</sup>, Jun Wang <sup>1,6</sup>, Jing Sun <sup>1,6</sup>, Yi Li <sup>1,\*</sup>, Jyan-Chyun Jang <sup>4,\*</sup>, and Wenjing Li <sup>2,5,\*</sup>

<sup>1</sup> Qinghai Provincial Key Laboratory of Qinghai-Tibet Plateau Biological Resources, Northwest Institute of Plateau Biology, Chinese Academy of Sciences, Xining 810008, China; yphu@nwipb.cas.cn (Y.H.); 848009178@qq.com (H.Z.); 54667402@qq.com (Q.Q.); Slnwipb@163.com (J.W.); qidian1518@sohu.com (J.S.); liyi@nwipb.cas.cn (Y.L.)

<sup>2</sup> Key Laboratory of Adaptation and Evolution of Plateau Biota, Northwest Institute of Plateau Biology, Chinese Academy of Sciences, Xining 810008, China; wjli@nwipb.cas.cn (W.L.)

<sup>3</sup> School of Life Sciences, Jinggangshan University, Ji'an 343009, China; 376664833@qq.com (G.L.)

<sup>4</sup> Department of Horticulture and Crop Science, The Ohio State University, Columbus 43210, OH, USA; Jang.40@osu.edu (J.J.)

<sup>5</sup> Scientific Research and Popularization Base of Qinghai-Tibet Plateau Biology, Qinghai Provincial Key Laboratory of Animal Ecological Genomics, Xining 810008, China

<sup>6</sup> University of Chinese Academy of Sciences, Beijing 100049, China

\* Correspondence: wjli@nwipb.cas.cn (W.L.); liyi@nwipb.cas.cn (Y.L.); Jang.40@osu.edu (J.J.)

## 1. Supplementary Figures and Tables

### 1.1 Supplementary Figures

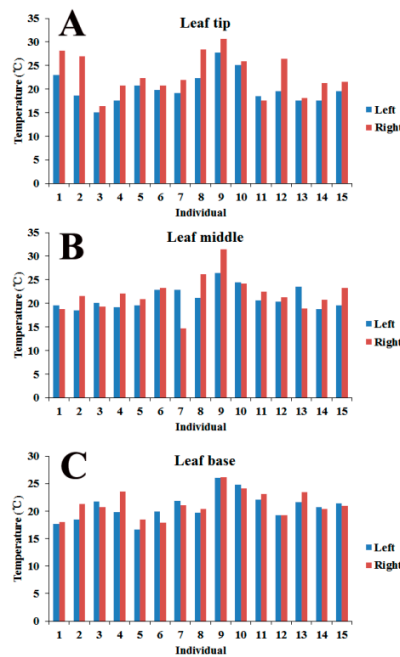

**Figure S1.** Leaf temperatures of 15 individual samples on the opposite sides of the middle of five first-order veins. (A) tip; (B) middle; (C) base.

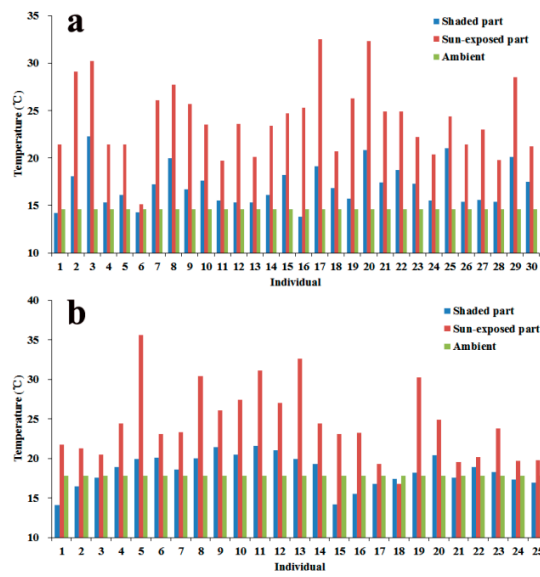

**Figure S2.** Leaf temperatures of sun-exposed and shaded parts from 25–30 individual samples. (a) ambient temperature at 14.6°C; (b) ambient temperature at 17.8°C.

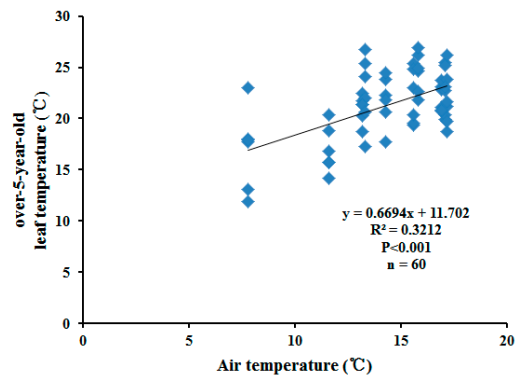

**Figure S3.** Correlation between leaf temperature of the over-5-year-old plant and air temperature during the time-course experiment.

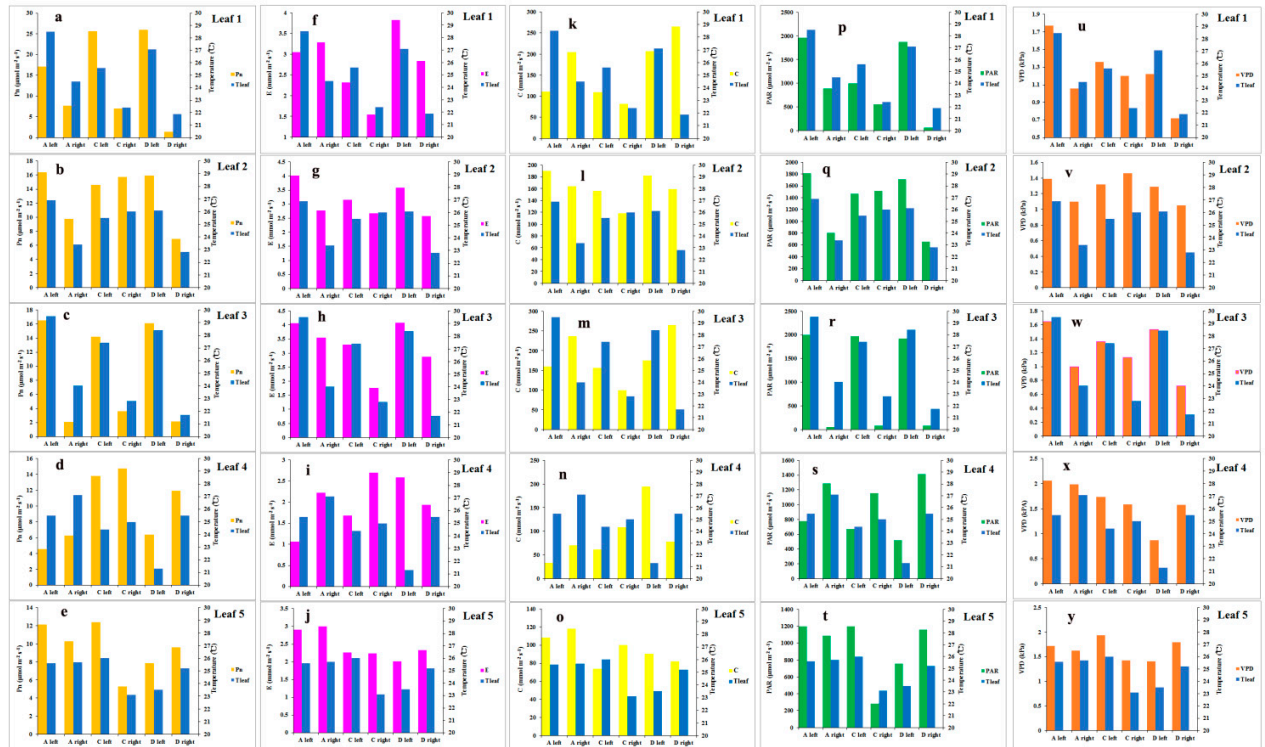

**Figure S4.** Leaf physiological parameters in different positions of large leaves from over-5-year-old plants in detail. (a-e) Net photosynthesis rate (Pn); (f-j) Transpiration rate (E); (k-o) Stomatal conductance rate (C); (p-t) Photosynthetically active radiation (PAR); (u-y) Vapor pressure deficit (VPD); Tleaf: leaf temperature; Leaf positions on two sides of the middle of five first-order veins are labeled (A left and A right) for the tip and (C left and C right) for the base; Leaf middle positions on the opposite sides of the fourth of five first-order veins are labeled (D left and D right).

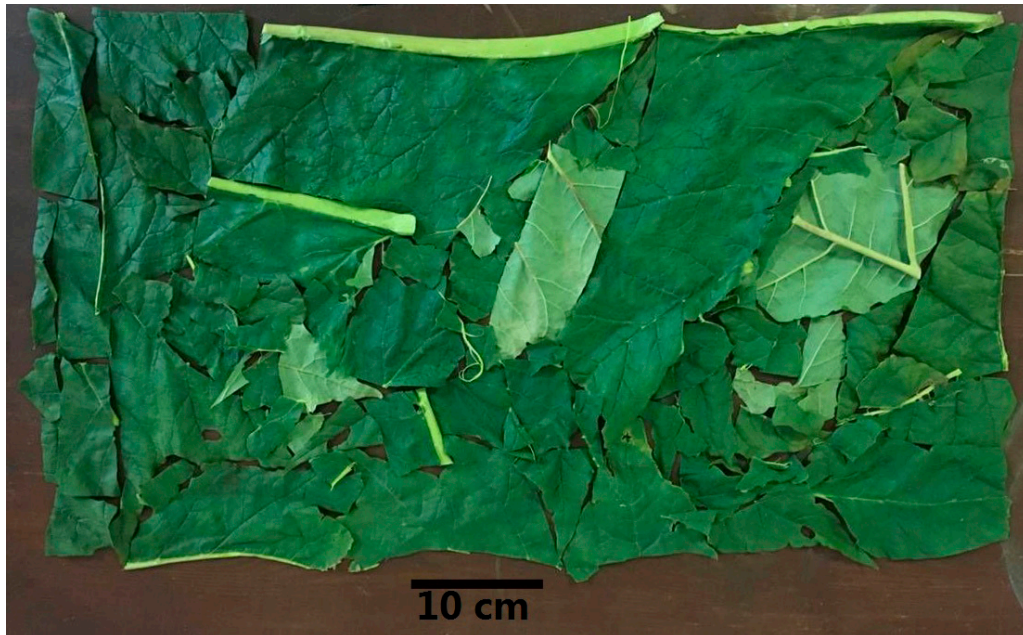

**Figure S5.** A spliced leaf composite from an over-5-year-old *R. tanguticum* plant.

## 1.2 Supplementary Tables

**Table S1.** Statistical analysis of the leaf characters of *R. tanguticum* at different ages.

|                            | <i>F</i> | <i>d.f.</i> | <i>P</i> |
|----------------------------|----------|-------------|----------|
| Leaf Length                | 563.204  | 2,87        | < 0.001  |
| Leaf Width                 | 580.901  | 2,87        | < 0.001  |
| Leaf area                  | 88.471   | 2,59        | < 0.001  |
| Leaf dry mass              | 62.192   | 2,41        | < 0.001  |
| Leaf number per individual | 217.963  | 2,91        | < 0.001  |

One-way ANOVAs were performed with an alpha level of 0.01 or 0.05, and provided with the following *F* values (*F*) and degrees of freedom (*d.f.*).

**Table S2.** The angles between different first-order veins and plane of the middle of five first-order veins.

| Traits                                                                                         | Value (°)            |
|------------------------------------------------------------------------------------------------|----------------------|
| Between the plane of the middle of five first-order veins and second of five first-order veins | 30.60 ± 2.44 (n = 5) |
| Between the plane of the middle of five first-order veins and first of five first-order veins  | 64.20 ± 4.43 (n = 5) |
| Between the second and third of five first-order veins                                         | 65.20 ± 2.27 (n = 5) |
| Between the first and second of five first-order veins                                         | 57.60 ± 2.50 (n = 5) |
| Between the first and fifth of five first-order veins                                          | 51.60 ± 8.87 (n = 5) |

**Table S3.** Details of the calculations of intersection angle ( $\alpha$ ) and ratio of solar radiation exposure in leaves of over-5-year-old *R. tanguticum*.

| Over-5-year-old | AB<br>(mm) | AC<br>(mm) | BC<br>(mm) | AB <sup>2</sup> | AC <sup>2</sup> | BC <sup>2</sup> | AB <sup>2</sup> +AC <sup>2</sup> -BC <sup>2</sup> | 2AB×<br>AC | $\cos\alpha=(AB^2+AC^2-BC^2)/2AB\times AC$ | $\alpha$ | BC/(AB+AC) |
|-----------------|------------|------------|------------|-----------------|-----------------|-----------------|---------------------------------------------------|------------|--------------------------------------------|----------|------------|
| 1               | 45         | 47         | 44         | 2025            | 2209            | 1936            | 2298                                              | 4230       | 0.5433                                     | 57.09    | 0.4783     |
| 2               | 36         | 35         | 35         | 1296            | 1225            | 1225            | 1296                                              | 2520       | 0.5143                                     | 59.05    | 0.4930     |
| 3               | 70         | 65         | 84         | 4900            | 4225            | 7056            | 2069                                              | 9100       | 0.2274                                     | 76.86    | 0.6222     |
| 4               | 52         | 50         | 41         | 2704            | 2500            | 1681            | 3523                                              | 5200       | 0.6775                                     | 47.35    | 0.4020     |
| 5               | 74         | 73         | 71         | 5476            | 5329            | 5041            | 5764                                              | 10804      | 0.5335                                     | 57.76    | 0.4830     |
| 6               | 70         | 70         | 66         | 4900            | 4900            | 4356            | 5444                                              | 9800       | 0.5555                                     | 56.25    | 0.4714     |
| 7               | 65         | 60         | 67         | 4225            | 3600            | 4489            | 3336                                              | 7800       | 0.4277                                     | 64.68    | 0.5360     |
| 8               | 61         | 59         | 55         | 3721            | 3481            | 3025            | 4177                                              | 7198       | 0.5803                                     | 54.53    | 0.4583     |
| 9               | 52         | 50         | 49         | 2704            | 2500            | 2401            | 2803                                              | 5200       | 0.5390                                     | 57.38    | 0.4804     |
| 10              | 52         | 52         | 52         | 2704            | 2704            | 2704            | 2704                                              | 5408       | 0.5000                                     | 60.00    | 0.5000     |
| 11              | 39         | 40         | 37         | 1521            | 1600            | 1369            | 1752                                              | 3120       | 0.5615                                     | 55.84    | 0.4684     |
| 12              | 40         | 42         | 37         | 1600            | 1764            | 1369            | 1995                                              | 3360       | 0.5938                                     | 53.58    | 0.4512     |
| 13              | 51         | 53         | 55         | 2601            | 2809            | 3025            | 2385                                              | 5406       | 0.4412                                     | 63.82    | 0.5288     |
| 14              | 40         | 39         | 41         | 1600            | 1521            | 1681            | 1440                                              | 3120       | 0.4615                                     | 62.51    | 0.5190     |
| 15              | 66         | 64         | 77         | 4356            | 4096            | 5929            | 2523                                              | 8448       | 0.2987                                     | 72.62    | 0.5923     |
| 16              | 39         | 40         | 44         | 1521            | 1600            | 1936            | 1185                                              | 3120       | 0.3798                                     | 67.68    | 0.5570     |
| 17              | 40         | 42         | 32         | 1600            | 1764            | 1024            | 2340                                              | 3360       | 0.6964                                     | 45.86    | 0.3902     |
| 18              | 57         | 60         | 55         | 3249            | 3600            | 3025            | 3824                                              | 6840       | 0.5591                                     | 56.01    | 0.4701     |
| 19              | 42         | 43         | 40         | 1764            | 1849            | 1600            | 2013                                              | 3612       | 0.5573                                     | 56.13    | 0.4706     |
| 20              | 83         | 80         | 85         | 6889            | 6400            | 7225            | 6064                                              | 13280      | 0.4566                                     | 62.83    | 0.5215     |
| 21              | 68         | 72         | 74         | 4624            | 5184            | 5476            | 4332                                              | 9792       | 0.4424                                     | 63.74    | 0.5286     |
| 22              | 33         | 35         | 37         | 1089            | 1225            | 1369            | 945                                               | 2310       | 0.4091                                     | 65.85    | 0.5441     |
| 23              | 40         | 42         | 40         | 1600            | 1764            | 1600            | 1764                                              | 3360       | 0.5250                                     | 58.33    | 0.4878     |
| 24              | 66         | 68         | 67         | 4356            | 4624            | 4489            | 4491                                              | 8976       | 0.5003                                     | 59.98    | 0.5000     |
| 25              | 70         | 68         | 78         | 4900            | 4624            | 6084            | 3440                                              | 9520       | 0.3613                                     | 68.82    | 0.5652     |
| 26              | 63         | 64         | 65         | 3969            | 4096            | 4225            | 3840                                              | 8064       | 0.4762                                     | 61.56    | 0.5118     |
| 27              | 47         | 46         | 43         | 2209            | 2116            | 1849            | 2476                                              | 4324       | 0.5726                                     | 55.07    | 0.4624     |
| 28              | 30         | 31         | 32         | 900             | 961             | 1024            | 837                                               | 1860       | 0.4500                                     | 63.26    | 0.5246     |
| 29              | 48         | 48         | 51         | 2304            | 2304            | 2601            | 2007                                              | 4608       | 0.4355                                     | 64.18    | 0.5313     |
| 30              | 47         | 42         | 49         | 2209            | 1764            | 2401            | 1572                                              | 3948       | 0.3982                                     | 66.54    | 0.5506     |
| average         |            |            |            |                 |                 |                 |                                                   |            |                                            | 60.51    | 0.5033     |
| SE              |            |            |            |                 |                 |                 |                                                   |            |                                            | 1.22     | 0.0091     |

**Table S4.** Details of the calculations of intersection angle ( $\beta$ ) and ratio of solar radiation exposure in leaves of over-5-year-old *R. tanguticum*.

| Over-5-year-old | DE<br>(mm) | DF<br>(mm) | EF<br>(mm) | DE <sup>2</sup> | DF <sup>2</sup> | EF <sup>2</sup> | DE <sup>2</sup> +DF <sup>2</sup> -EF <sup>2</sup> | 2DE×DF | $\cos\beta=(DE^2+DF^2-EF^2)/2DE\times DF$ | $\beta$ | EF/(DE+EF) |
|-----------------|------------|------------|------------|-----------------|-----------------|-----------------|---------------------------------------------------|--------|-------------------------------------------|---------|------------|
| 1               | 16         | 16         | 15         | 256             | 256             | 225             | 287                                               | 512    | 0.5605                                    | 55.91   | 0.4688     |
| 2               | 27         | 24         | 28         | 729             | 576             | 784             | 521                                               | 1296   | 0.4020                                    | 66.30   | 0.5490     |
| 3               | 28         | 23         | 22         | 784             | 529             | 484             | 829                                               | 1288   | 0.6436                                    | 49.94   | 0.4314     |
| 4               | 37         | 36         | 34         | 1369            | 1296            | 1156            | 1509                                              | 2664   | 0.5664                                    | 55.50   | 0.4658     |
| 5               | 27         | 27         | 27         | 729             | 729             | 729             | 729                                               | 1458   | 0.5000                                    | 60.00   | 0.5000     |
| 6               | 29         | 27         | 25         | 841             | 729             | 625             | 945                                               | 1566   | 0.6034                                    | 52.88   | 0.4464     |
| 7               | 26         | 28         | 27         | 676             | 784             | 729             | 731                                               | 1456   | 0.5021                                    | 59.86   | 0.5000     |
| 8               | 29         | 27         | 25         | 841             | 729             | 625             | 945                                               | 1566   | 0.6034                                    | 52.88   | 0.4464     |
| 9               | 20         | 21         | 20         | 400             | 441             | 400             | 441                                               | 840    | 0.5250                                    | 58.33   | 0.4878     |
| 10              | 27         | 29         | 28         | 729             | 841             | 784             | 786                                               | 1566   | 0.5019                                    | 59.87   | 0.5000     |
| 11              | 29         | 30         | 31         | 841             | 900             | 961             | 780                                               | 1740   | 0.4483                                    | 63.37   | 0.5254     |
| 12              | 30         | 30         | 29         | 900             | 900             | 841             | 959                                               | 1800   | 0.5328                                    | 57.81   | 0.4833     |
| 13              | 32         | 30         | 32         | 1024            | 900             | 1024            | 900                                               | 1920   | 0.4688                                    | 62.05   | 0.5161     |
| 14              | 16         | 15         | 17         | 256             | 225             | 289             | 192                                               | 480    | 0.4000                                    | 66.42   | 0.5484     |
| 15              | 42         | 41         | 39         | 1764            | 1681            | 1521            | 1924                                              | 3444   | 0.5587                                    | 56.04   | 0.4699     |
| 16              | 25         | 25         | 26         | 625             | 625             | 676             | 574                                               | 1250   | 0.4592                                    | 62.66   | 0.5200     |
| 17              | 31         | 32         | 30         | 961             | 1024            | 900             | 1085                                              | 1984   | 0.5469                                    | 56.85   | 0.4762     |
| 18              | 28         | 30         | 28         | 784             | 900             | 784             | 900                                               | 1680   | 0.5357                                    | 57.61   | 0.4828     |
| 19              | 32         | 30         | 31         | 1024            | 900             | 961             | 963                                               | 1920   | 0.5016                                    | 59.90   | 0.5000     |
| 20              | 29         | 30         | 33         | 841             | 900             | 1089            | 652                                               | 1740   | 0.3747                                    | 67.99   | 0.5593     |
| 21              | 34         | 36         | 40         | 1156            | 1296            | 1600            | 852                                               | 2448   | 0.3480                                    | 69.63   | 0.5714     |
| 22              | 27         | 26         | 30         | 729             | 676             | 900             | 505                                               | 1404   | 0.3597                                    | 68.92   | 0.5660     |
| 23              | 29         | 28         | 25         | 841             | 784             | 625             | 1000                                              | 1624   | 0.6158                                    | 51.99   | 0.4386     |
| 24              | 32         | 30         | 30         | 1024            | 900             | 900             | 1024                                              | 1920   | 0.5333                                    | 57.77   | 0.4839     |
| 25              | 41         | 43         | 45         | 1681            | 1849            | 2025            | 1505                                              | 3526   | 0.4268                                    | 64.73   | 0.5357     |
| 26              | 20         | 22         | 21         | 400             | 484             | 441             | 443                                               | 880    | 0.5034                                    | 59.77   | 0.5000     |
| 27              | 36         | 35         | 32         | 1296            | 1225            | 1024            | 1497                                              | 2520   | 0.5940                                    | 53.56   | 0.4507     |
| 28              | 29         | 28         | 28         | 841             | 784             | 784             | 841                                               | 1624   | 0.5179                                    | 58.81   | 0.4912     |
| 29              | 39         | 40         | 39         | 1521            | 1600            | 1521            | 1600                                              | 3120   | 0.5128                                    | 59.15   | 0.4937     |
| 30              | 33         | 32         | 34         | 1089            | 1024            | 1156            | 957                                               | 2112   | 0.4531                                    | 63.06   | 0.5231     |
| Average         |            |            |            |                 |                 |                 |                                                   |        |                                           | 59.65   | 0.4977     |
| SE              |            |            |            |                 |                 |                 |                                                   |        |                                           | 0.93    | 0.0070     |

**Table S5.** Details of the calculations of intersection angle ( $\alpha$ ) and ratio of solar radiation exposure in leaves of 3 to 4-year-old *R. tanguticum*.

| 3 to 4-year-old | AB (mm) | AC (mm) | BC (mm) | AB <sup>2</sup> | AC <sup>2</sup> | BC <sup>2</sup> | AB <sup>2</sup> +AC <sup>2</sup> -BC <sup>2</sup> | 2AB×AC | $\cos\alpha=(AB^2+AC^2-BC^2)/2AB\times AC$ | $\alpha$ | BC/(AB+AC) |
|-----------------|---------|---------|---------|-----------------|-----------------|-----------------|---------------------------------------------------|--------|--------------------------------------------|----------|------------|
| 1               | 51      | 50      | 67      | 2601            | 2500            | 4489            | 612                                               | 5100   | 0.1200                                     | 83.11    | 0.6634     |
| 2               | 45      | 40      | 53      | 2025            | 1600            | 2809            | 816                                               | 3600   | 0.2267                                     | 76.90    | 0.6235     |
| 3               | 44      | 43      | 64      | 1936            | 1849            | 4096            | -311                                              | 3784   | -0.0822                                    | 94.71    | 0.7356     |
| 4               | 34      | 32      | 48      | 1156            | 1024            | 2304            | -124                                              | 2176   | -0.0570                                    | 93.27    | 0.7273     |
| 5               | 40      | 42      | 54      | 1600            | 1764            | 2916            | 448                                               | 3360   | 0.1333                                     | 82.34    | 0.6585     |
| 6               | 29      | 30      | 40      | 841             | 900             | 1600            | 141                                               | 1740   | 0.0810                                     | 85.35    | 0.6780     |
| 7               | 45      | 43      | 65      | 2025            | 1849            | 4225            | -351                                              | 3870   | -0.0907                                    | 95.20    | 0.7386     |
| 8               | 35      | 37      | 45      | 1225            | 1369            | 2025            | 569                                               | 2590   | 0.2197                                     | 77.31    | 0.6250     |
| 9               | 33      | 32      | 41      | 1089            | 1024            | 1681            | 432                                               | 2112   | 0.2045                                     | 78.20    | 0.6308     |
| 10              | 24      | 23      | 34      | 576             | 529             | 1156            | -51                                               | 1104   | -0.0462                                    | 92.65    | 0.7234     |
| 11              | 35      | 33      | 48      | 1225            | 1089            | 2304            | 10                                                | 2310   | 0.0043                                     | 89.75    | 0.7059     |
| 12              | 26      | 27      | 35      | 676             | 729             | 1225            | 180                                               | 1404   | 0.1282                                     | 82.63    | 0.6604     |
| 13              | 25      | 24      | 30      | 625             | 576             | 900             | 301                                               | 1200   | 0.2508                                     | 75.47    | 0.6122     |
| 14              | 31      | 30      | 43      | 961             | 900             | 1849            | 12                                                | 1860   | 0.0065                                     | 89.63    | 0.7049     |
| 15              | 24      | 23      | 28      | 576             | 529             | 784             | 321                                               | 1104   | 0.2908                                     | 73.10    | 0.5957     |
| 16              | 20      | 19      | 26      | 400             | 361             | 676             | 85                                                | 760    | 0.1118                                     | 83.58    | 0.6667     |
| 17              | 21      | 19      | 27      | 441             | 361             | 729             | 73                                                | 798    | 0.0915                                     | 84.75    | 0.6750     |
| 18              | 33      | 34      | 44      | 1089            | 1156            | 1936            | 309                                               | 2244   | 0.1377                                     | 82.09    | 0.6567     |
| 19              | 33      | 34      | 49      | 1089            | 1156            | 2401            | -156                                              | 2244   | -0.0695                                    | 93.99    | 0.7313     |
| 20              | 34      | 36      | 51      | 1156            | 1296            | 2601            | -149                                              | 2448   | -0.0609                                    | 93.49    | 0.7286     |
| 21              | 42      | 43      | 58      | 1764            | 1849            | 3364            | 249                                               | 3612   | 0.0689                                     | 86.05    | 0.6824     |
| 22              | 31      | 28      | 42      | 961             | 784             | 1764            | -19                                               | 1736   | -0.0109                                    | 90.63    | 0.7119     |
| 23              | 37      | 38      | 51      | 1369            | 1444            | 2601            | 212                                               | 2812   | 0.0754                                     | 85.68    | 0.6800     |
| 24              | 32      | 30      | 46      | 1024            | 900             | 2116            | -192                                              | 1920   | -0.1000                                    | 95.74    | 0.7419     |
| 25              | 18      | 18      | 25      | 324             | 324             | 625             | 23                                                | 648    | 0.0355                                     | 87.97    | 0.6944     |
| 26              | 31      | 33      | 44      | 961             | 1089            | 1936            | 114                                               | 2046   | 0.0557                                     | 86.81    | 0.6875     |
| 27              | 19      | 19      | 26      | 361             | 361             | 676             | 46                                                | 722    | 0.0637                                     | 86.35    | 0.6842     |
| 28              | 17      | 17      | 25      | 289             | 289             | 625             | -47                                               | 578    | -0.0813                                    | 94.66    | 0.7353     |
| 29              | 19      | 20      | 24      | 361             | 400             | 576             | 185                                               | 760    | 0.2434                                     | 75.91    | 0.6154     |
| 30              | 20      | 28      | 27      | 400             | 784             | 729             | 455                                               | 1120   | 0.4063                                     | 66.03    | 0.5625     |
| Average         |         |         |         |                 |                 |                 |                                                   |        |                                            | 85.44    | 0.6779     |
| SE              |         |         |         |                 |                 |                 |                                                   |        |                                            | 1.38     | 0.0087     |

**Table S6.** Summary of statistical analysis of the temperature of opposite parts of leaves.

|                       | <i>t</i> | <i>df.</i> | <i>P</i> |
|-----------------------|----------|------------|----------|
| Tip                   | 4.51     | 1,14       | < 0.001  |
| Middle                | 0.86     | 1,14       | 0.41     |
| Base                  | 1.23     | 1,14       | 0.24     |
| Sun-exposed vs shaded | 14.33    | 1,54       | < 0.001  |
| Highest vs lowest     | 53.26    | 1,149      | < 0.001  |

Paired-samples T-tests were used to analyze the temperature of opposite parts of leaf (right and left sides of the middle of five first-order veins, i.e., sun-exposed and shaded part), and highest vs lowest temperature of one thermal imaging of *R. tanguticum* leaf. The following *t* values (*t*) and degrees of freedom (*df.*) were provided. The *P* values were based on two-tailed permutation tests.

**Table S7.** Summary of statistical analysis of the photosynthetic parameters of opposite parts of over-5-year-old large leaves.

| parameters | <i>t</i> | <i>df</i> | <i>P</i> |
|------------|----------|-----------|----------|
| Pn         | 3.157    | 1,14      | 0.007    |
| E          | 1.779    | 1,14      | 0.097    |
| C          | 0.630    | 1,14      | 0.539    |
| PAR        | 2.566    | 1,14      | 0.022    |
| Tleaf      | 2.431    | 1,14      | 0.029    |
| VPD        | 1.989    | 1,14      | 0.067    |

Paired-samples T-tests were used to analyze the photosynthesis of opposite parts of leaf (right and left sides of large leaves), The following *t* values (*t*) and degrees of freedom (*df.*) were provided. The *P* values were based on two-tailed permutation tests.



**Table S8.** Correlation matrix of photosynthetic parameters and environmental factors in *R. tanguticum*.

| factor | Pn | E      | C       | Tleaf   | PAR     | VPD      |
|--------|----|--------|---------|---------|---------|----------|
| Pn     | 1  | 0.405* | -0.100  | 0.683** | 0.775** | 0.305    |
| E      |    | 1      | 0.699** | 0.486** | 0.526** | -0.250   |
| C      |    |        | 1       | -0.195  | -0.119  | -0.802** |
| Tleaf  |    |        |         | 1       | 0.900** | 0.641**  |
| PAR    |    |        |         |         | 1       | 0.491**  |
| VPD    |    |        |         |         |         | 1        |

\*, Correlation is significant at the 0.05 level (2-tailed).

\*\*, Correlation is significant at the 0.01 level (2-tailed).

**Table S9.** Multiple linear regression equations for photosynthetic parameters and environmental factors of *R. tanguticum*.

| Photosynthetic parameters | Multiple linear regression equations | Correlative coefficients <i>R</i> | <i>F</i> | <i>P</i> |
|---------------------------|--------------------------------------|-----------------------------------|----------|----------|
| Pn                        | $Y = 2.821 + 0.775PAR$               | 0.775                             | 42.233   | <0.001   |
| E                         | $Y = -4.465 + 1.095Tleaf - 0.951VPD$ | 0.877                             | 45.035   | <0.001   |
| C                         | $Y = 21.609 + 0.541Tleaf - 1.149VPD$ | 0.903                             | 59.872   | <0.001   |

**Table S10.** Statistical analysis of the speed of airflow around the leaves of over-5-year-old plants.

|                             | <i>t</i> | <i>d.f.</i> | <i>P</i> |
|-----------------------------|----------|-------------|----------|
| Middle area vs outside area | 5.29     | 1,59        | < 0.001  |

Paired-samples T-tests were used to analyze the airflow in the middle area (approximately 1 cm above the middle of the third of five first-order veins) and outside area (10 cm vertical above the middle area) of the leaves of over-5-year-old plants. The following *t* values (*t*) and degrees of freedom (*d.f.*) were provided. The *P* values were based on two-tailed permutation tests.

## **2. Supplementary Video**

**Video S1.** Airflow indicated by smoke movement around the large leaves of over-5-year-old plants.
